# Supplementary material
Source: Springer Nature journal article supplement (https://www.springermedizin.de/resource/supplementary/12885_2006_556_MOESM6_ESM.pdf/9469762)

# A DU145

HIF-1 $\alpha$

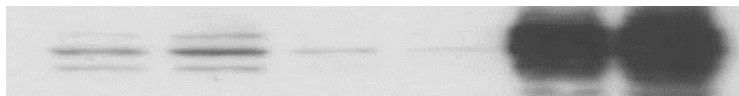

HIF-1 $\beta$

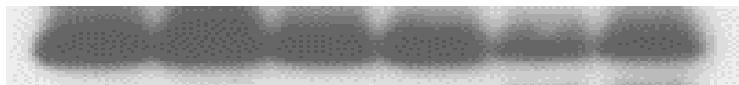

FBS

- + + + + +

MG132 ( $\mu$ M)

- - - - 10 10

DCPA ( $\mu$ M)

- - 75 150 75 150

# B PC-3

HIF-1 $\alpha$

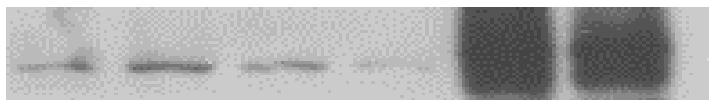

HIF-1 $\beta$

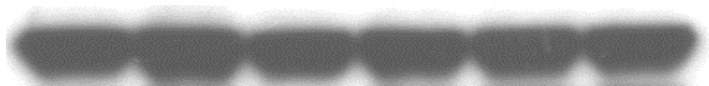

FBS

- + + + + +

MG132 ( $\mu$ M)

- - - - 10 10

DCPA ( $\mu$ M)

- - 75 150 75 150

Supplement: MOESM6 [file 9469762]
